# Supplementary material for: Invertebrate Decline Leads to Shifts in Plant Species Abundance and Phenology
Source: PubMed Central journal article supplement (PMC7527414; doi:10.3389/fpls.2020.542125), 2020-09-17
Supplement: Image_1.pdf [file Image_1.pdf]

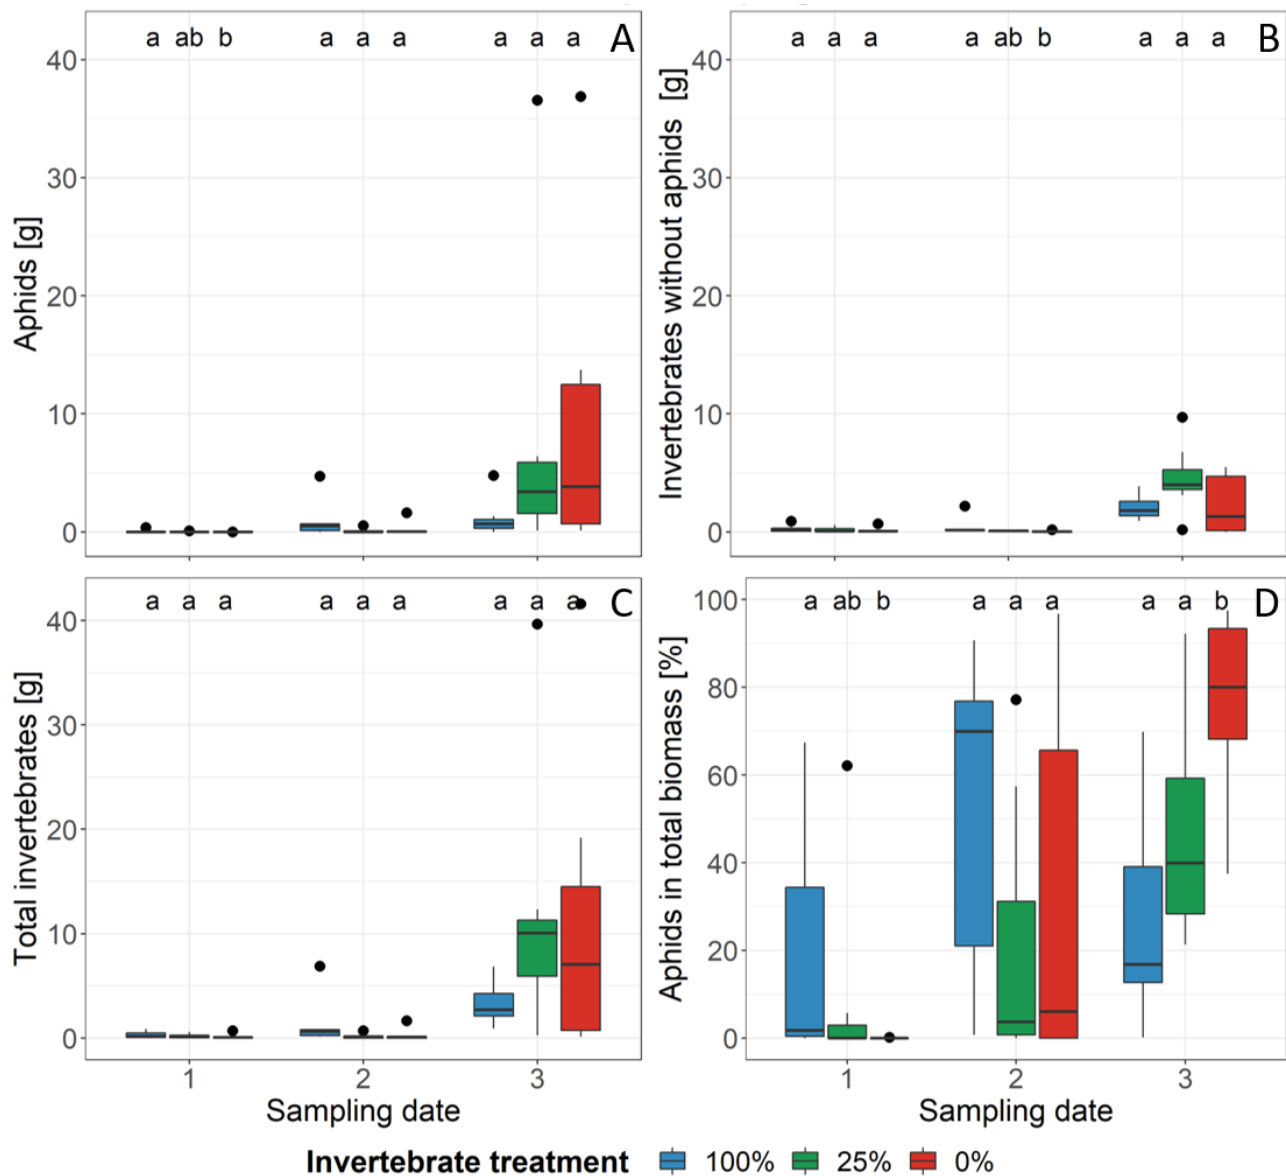

**Supplementary Figure 1.** Invertebrate biomass per sampling date. Significant differences were calculated for each sampling date separately. Invertebrate treatment is color-coded. (A) Aphid biomass, sampling date 1: Kruskal-Wallis test  $\chi^2=7.33$ ,  $df=2$ ,  $p<0.05$ , sampling date 2: Kruskal-Wallis test  $\chi^2=4.66$ ,  $df=2$ ,  $p=0.10$ , sampling date 3: Kruskal-Wallis test  $\chi^2=4.14$ ,  $df=2$ ,  $p=0.13$ , (B) Invertebrates without aphids, sampling date 1: Kruskal-Wallis test  $\chi^2=0.25$ ,  $df=2$ ,  $p=0.88$ , sampling date 2: Kruskal-Wallis test  $\chi^2=7.44$ ,  $df=2$ ,  $p<0.05$ , sampling date 3: Kruskal-Wallis test  $\chi^2=4.60$ ,  $df=2$ ,  $p=0.10$ , (C) Total invertebrates, sampling date 1: Kruskal-Wallis test  $\chi^2=1.01$ ,  $df=2$ ,  $p=0.60$ , sampling date 2: Kruskal-Wallis test  $\chi^2=5.84$ ,  $df=2$ ,  $p=0.05$ , sampling date 3: Kruskal-Wallis test  $\chi^2=3.03$ ,  $df=2$ ,  $p=0.22$ . (D) Aphids in total biomass, sampling date 1: Kruskal-Wallis test  $\chi^2=7.60$ ,

df=2,  $p < 0.05$ , sampling date 2: Kruskal-Wallis test  $\chi^2 = 2.28$ , df=2,  $p = 0.24$ , sampling date 3: ANOVA  
F=9.86, df= 2,  $p < 0.001$ .
