# Supplementary material for: Invertebrate Decline Leads to Shifts in Plant Species Abundance and Phenology
Source: PubMed Central journal article supplement (PMC7527414; doi:10.3389/fpls.2020.542125), 2020-09-17
Supplement: Image_2.pdf [file Image_2.pdf]

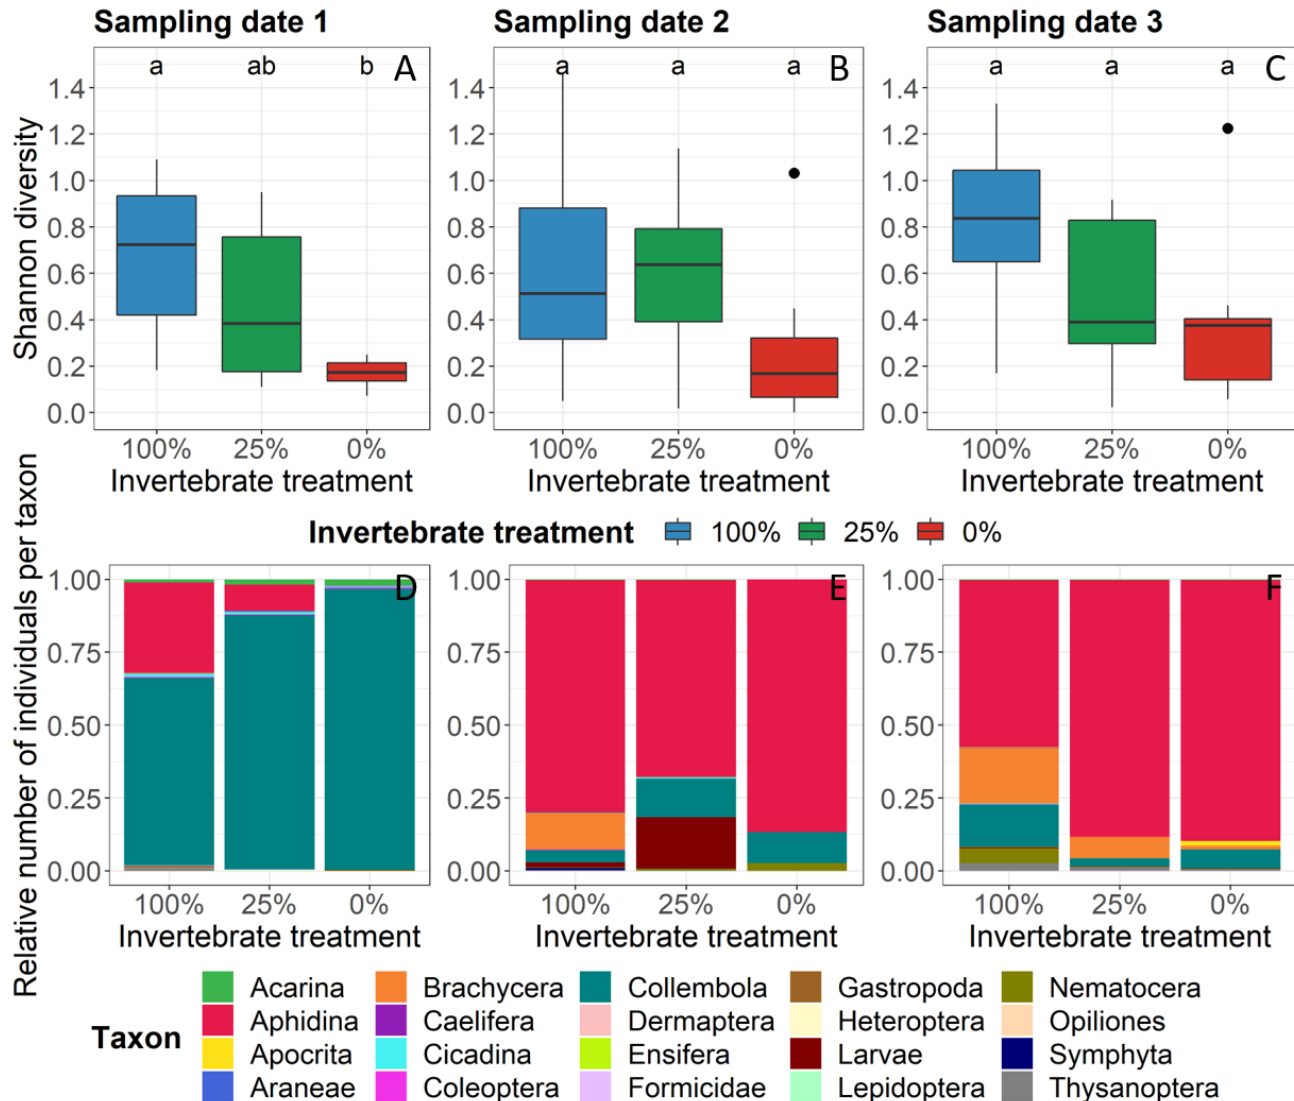

**Supplementary Figure 2.** Shannon diversity and relative number of individuals per taxon according to the three sampling dates. (A) Boxplots with Shannon diversity for sampling date 1, Kruskal-Wallis test  $\chi^2=7.08$ ,  $df=2$ ,  $p<0.05$ , (B) Boxplots with Shannon diversity for sampling date 2, Kruskal-Wallis test  $\chi^2=4.38$ ,  $df=2$ ,  $p=0.11$ , (C) Boxplots with Shannon diversity for sampling date 3, ANOVA  $F=2.99$ ,  $df=2$ ,  $p=0.07$ . (D-F) Bar chart showing the relative number of individuals per invertebrate taxon. The taxa are color-coded.
