# Supplementary material for: Invertebrate Decline Leads to Shifts in Plant Species Abundance and Phenology
Source: PubMed Central journal article supplement (PMC7527414; doi:10.3389/fpls.2020.542125), 2020-09-17
Supplement: Image_5.pdf [file Image_5.pdf]

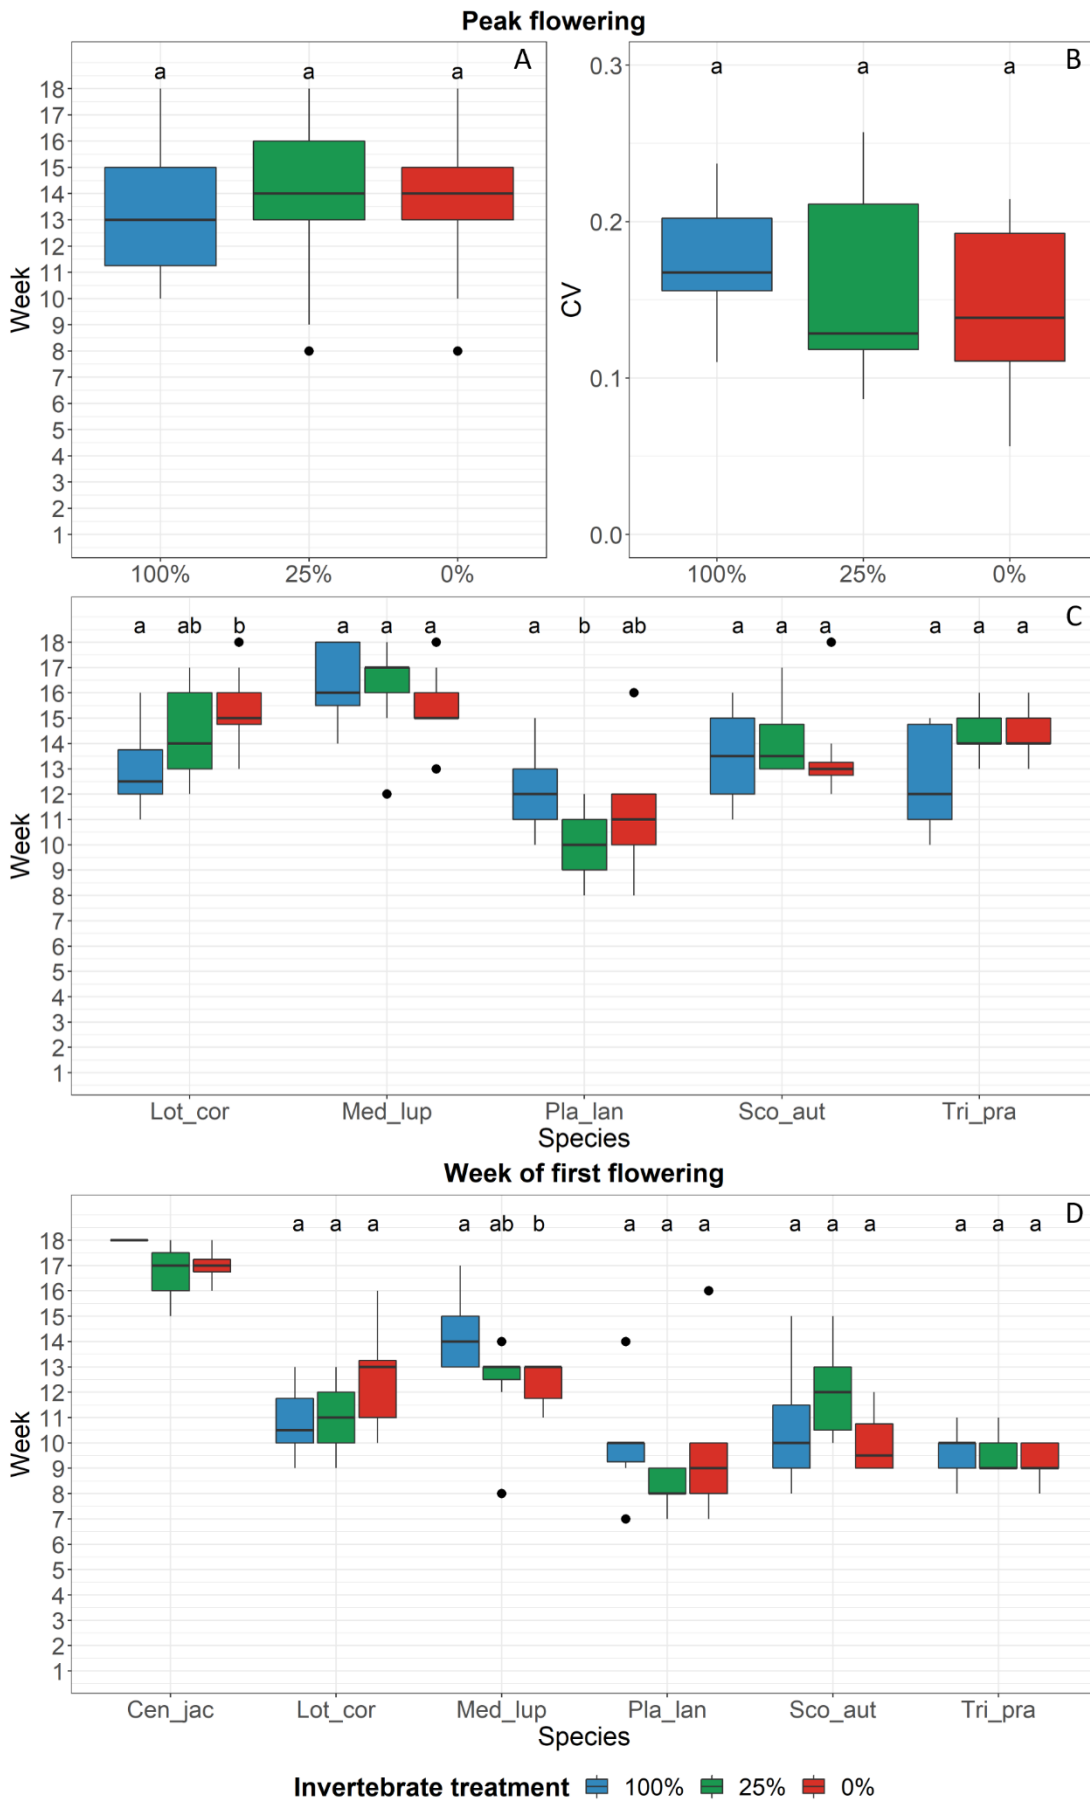

**Supplementary Figure 5.** Boxplots showing peak flowering dispersion and week of first flowering per species and treatment; black dots mark outliers (A) Peak flowering dispersion per treatment, Kruskal-Wallis test  $\chi^2=2.26$ ,  $df=2$ ,  $p=0.32$ ; (B) Coefficient of variation per treatment, Kruskal-Wallis test  $\chi^2=1.28$ ,  $df=2$ ,  $p=0.53$ ; (C) Peak flowering for all species that reached peak flowering stage (five out of seven), Lot\_cor: ANOVA  $F=4.33$ ,  $df=2$ ,  $p<0.05$ ; Med\_lup: Kruskal-Wallis test  $\chi^2=1.93$ ,  $df=2$ ,  $p=0.38$ , Pla\_lan: ANOVA  $F=3.21$ ,  $df=2$ ,  $p=0.06$ , Sco\_aut: Kruskal-Wallis test  $\chi^2=1.54$ ,  $df=2$ ,  $p=0.46$ , Tri\_pra: Kruskal-Wallis test  $\chi^2=4.79$ ,  $df=2$ ,  $p=0.09$ ; (D) Week of first flowering per species (six out of seven), Cen\_jac: no test, as only one observation for 100%-treatment, Lot\_cor: ANOVA  $F=2.67$ ,  $df=2$ ,  $p<0.10$ ; Med\_lup: Kruskal-Wallis test  $\chi^2=6.47$ ,  $df=2$ ,  $p=0.04$ , Pla\_lan: Kruskal-Wallis test  $\chi^2=2.90$ ,  $df=2$ ,  $p=0.23$ , Tri\_pra: Kruskal-Wallis test  $\chi^2=0.96$ ,  $df=2$ ,  $p=0.62$ . See Table 1 for species abbreviations.
