# Supplementary material for: Invertebrate Decline Leads to Shifts in Plant Species Abundance and Phenology
Source: PubMed Central journal article supplement (PMC7527414; doi:10.3389/fpls.2020.542125), 2020-09-17
Supplement: Image_6.pdf [file Image_6.pdf]

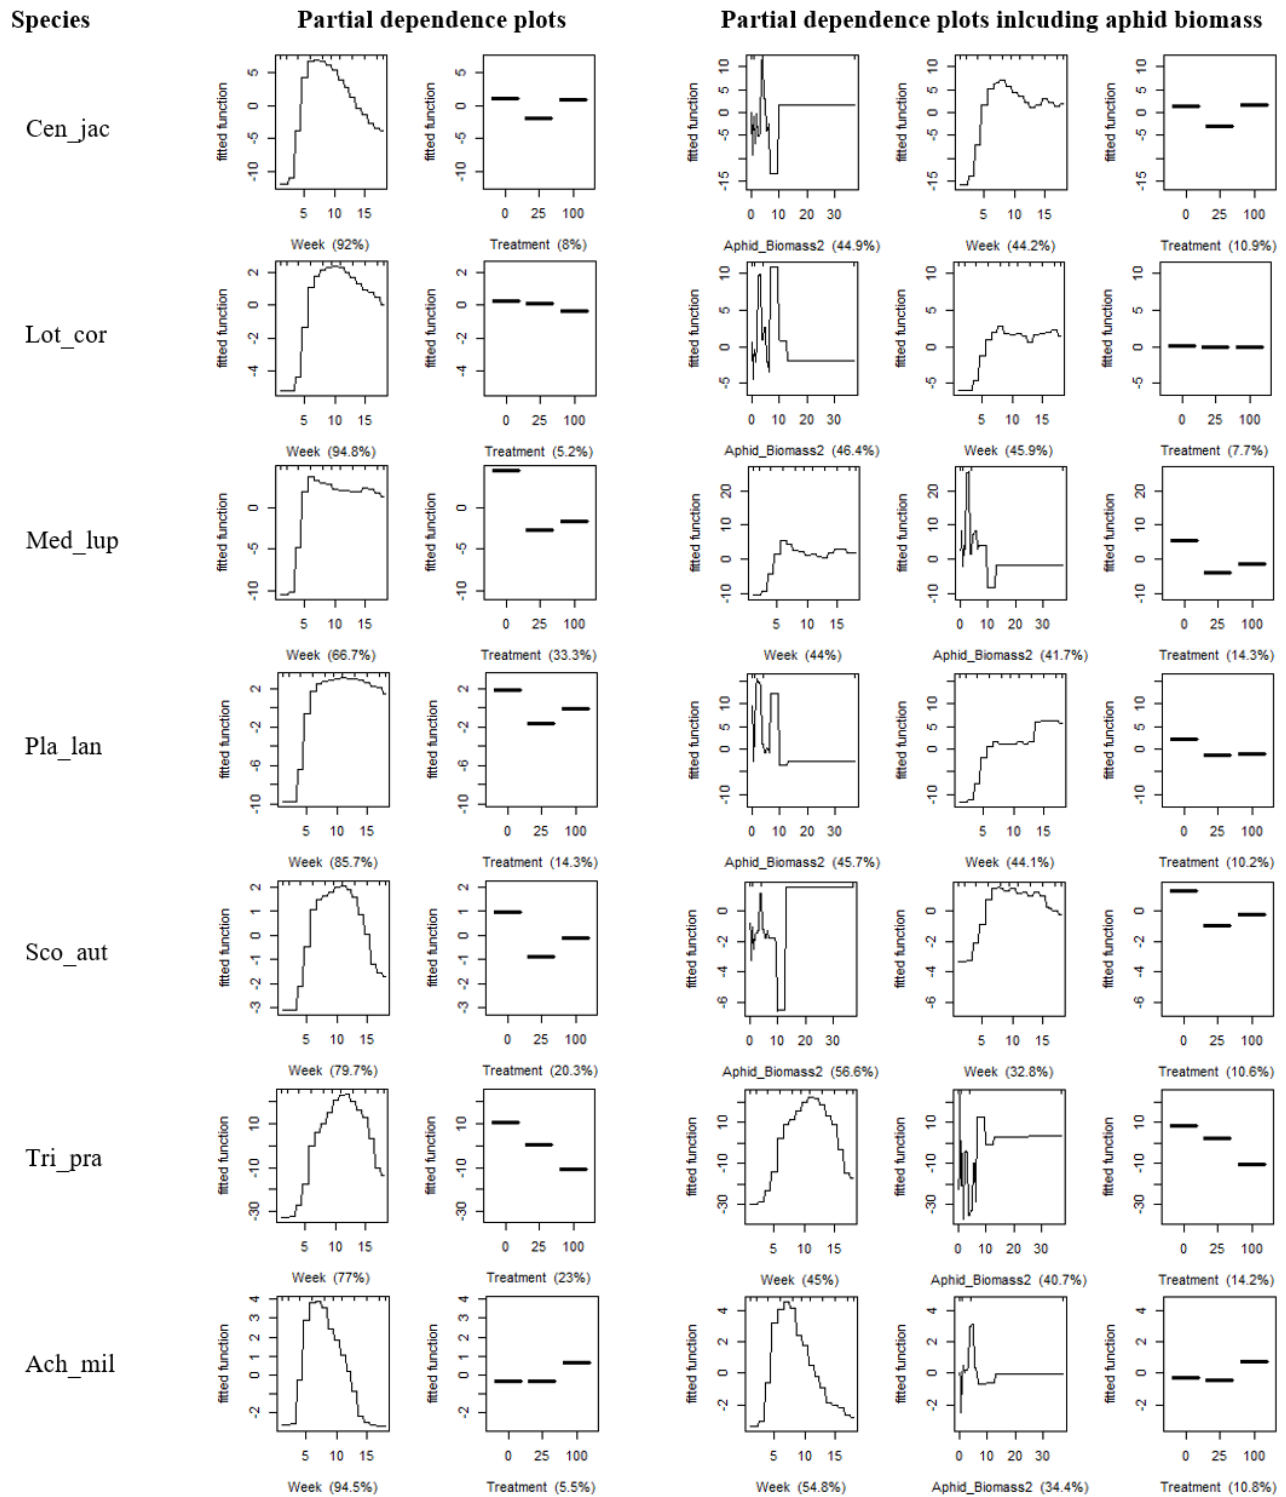

**Supplementary Figure 6.** Partial dependence plots from the BRT models according to the abundance given for every species (see Table 1 for species abbreviations). Left plots derived from

BRTs with variables week and treatment. Right plots derived from BRTs with variables week, treatment and aphid biomass.
