# Supplementary material for: Invertebrate Decline Leads to Shifts in Plant Species Abundance and Phenology
Source: PubMed Central journal article supplement (PMC7527414; doi:10.3389/fpls.2020.542125), 2020-09-17
Supplement: Image_8.pdf [file Image_8.pdf]

**Functional group**
**Partial dependence plots**
**Partial dependence plots including aphid biomass**

Forbs

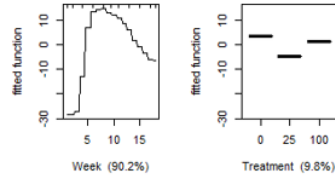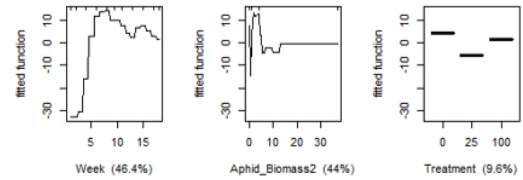

Legumes

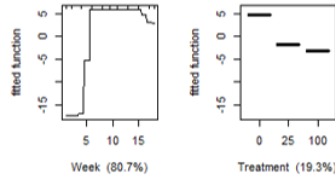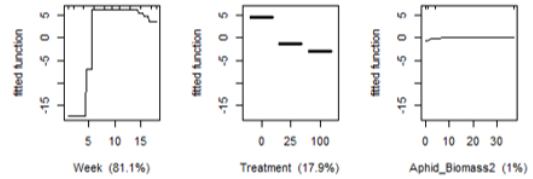

Grasses

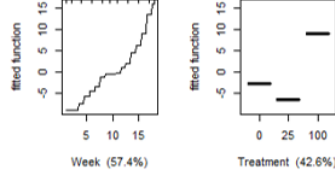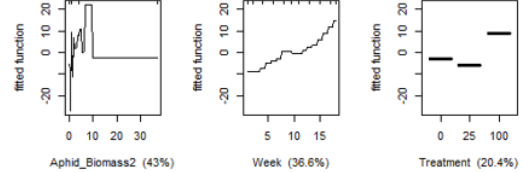

**Supplementary Figure 8.** Partial dependence plots from the BRT models according to the abundance given for every plant functional group. Left plots derived from BRTs with variables week and treatment. Right plots derived from BRTs with variables week, treatment and aphid biomass.
